# Supplementary material for: Genetic Markers as Risk Factors for the Development of Impulsive-Compulsive Behaviors in Patients with Parkinson’s Disease Receiving Dopaminergic Therapy
Source: MDPI journal article supplement (doi:10.3390/jpm11121321), 2021-12-07
Supplement: s1 [file s1]

**Genetic markers as risk factors for the development of impulsive-compulsive behaviors in patients with Parkinson's disease receiving dopaminergic therapy**

Anna Fedosova<sup>1</sup>, Nataliya Titova<sup>2,3,\*</sup>, Zarema Kokaeva<sup>1</sup>, Natalia Shipilova<sup>2,3</sup>, Elena Katunina<sup>2,3</sup>, Eugene Klimov<sup>1†</sup>

<sup>1</sup>Lomonosov Moscow State University, Faculty of Biology, Leninskie gory, 1, building 12, 119234 Moscow, Russia;

<sup>2</sup>Pirogov Russian National Research Medical University, Moscow, Russia; Ostrovitianova, 1, 117997, Moscow, Russia;

<sup>3</sup>Federal State Budgetary Institution "Federal center of brain research and neurotechnologies" of the Federal Medical Biological Agency, Moscow, Russia; Ostrovitianova, 1, building 10, 117997, Moscow, Russia;

† Deceased on July, 8, 2021;

\* Author to whom correspondence should be addressed – Nataliya Titova (e-mail: nattitova@yandex.ru, tel. +79032428792)

Table S1. Characteristics of primers and PCR conditions.

| Gene / SNP                | Primers 5'-3'                                                 | T <sub>annealing</sub> |
|---------------------------|---------------------------------------------------------------|------------------------|
| <i>BDNF</i><br>rs2049046  | F = CAAAGTGTGACTTCAGATTGTCTG<br>R = AGAATAAGACAGCAGTACCGTACTT | 56°C                   |
| <i>BDNF</i><br>rs6265     | F = GAGGACAAGGTGGCTTGGCCTA<br>R = GGCCGAACCTTCTGGTCCTC        | 61°C                   |
| <i>DBH</i><br>rs1611115   | F = CTAGTCCAGCTGGAGAGATCT<br>R = TTTGCCATCATCCACCCGTG         | 61°C                   |
| <i>DBH</i><br>rs141116007 | F = AATCAGGCACATGCACCTCC<br>R = GGCCCTGAGGAATCTTACAGG         | 56°C                   |
| <i>DBH</i><br>rs2097629   | F = GGCTTGGTGTGGTTAGGATGA<br>R = CCAGGGTCTTGTGCCTCACA         | 60°C                   |
| <i>DRD2</i><br>rs6275     | F = ATGGAGATGCTCTCCAGCAC<br>R = ACCTTTCACAGACCGGGCTG          | 60°C                   |
| <i>DRD2</i><br>rs1799732  | F = AGGACCCAGCCTGCAATCAC<br>R = TGCCGGTTCGGCACTGAAG           | 60°C                   |

|                          |                                                      |      |
|--------------------------|------------------------------------------------------|------|
| <i>MAOA</i><br>VNTR      | F = ACAGCCTCGCCGTGGAGAAG<br>R = GAACGGACGCTCCATTCGGA | 55°C |
| <i>ACE</i><br>rs4646994  | F = CTCCCATTCTCTAGACCTG<br>R = GCTCACCTCTGCTTGTAAG   | 55°C |
| <i>SLC6A3</i><br>rs27072 | F = CCACGCATCGGGAAAGGACT<br>R = GCACCTCGCCGTGTCTTGT  | 59°C |
| <i>DRD1</i><br>rs686     | F = GTGTGTTGGAAAGCAGCAGAG<br>R = CTGTCCCCAGCCCTATCAG | 58°C |

Table S2. Characteristics of primers and probes, PCR-RealTime conditions. \* - SNaPshot

| Gene / SNP                  | Primers 5'-3'                                                                                                                           | T <sub>annealing</sub> |
|-----------------------------|-----------------------------------------------------------------------------------------------------------------------------------------|------------------------|
| <i>DRD2</i><br>rs2283265 *  | G = GGAAACAGGCTCATAGAAGGTATGC<br>T =<br>CCGGCGCGGCCCGCGGAAACAGGCTCATAGAAGGTACGA<br>F = TTTTGCTGAGTGACCTTAGGCAA                          | 56°C                   |
| <i>DRD2</i><br>rs12364283 * | A = CTGTCCTCAGTTTGCCGGA<br>G = GCGCGCGCGCGCCCTGTCTCAGTTTGCCTGG<br>R = CAGCACCTGTTTAAGCCTCAGT                                            | 57°C                   |
| <i>DRD2</i><br>rs1076560 *  | C = TTGCAGGAGTCTTCAGAGTGG<br>A = CGGGCCGGCCGCCGGTTGCAGGAGTCTTCAGAGCGT<br>F = CTGCACCAGAGGCAGAGG                                         | 58°C                   |
| <i>COMT</i><br>rs6267       | F = GCAGCGCATCCTGAACC<br>R = CTTCTGCTCGCAGTAGGTGTC<br>FAM-CGGGAACGCACAGAGC-BHQ1<br>VIC-CGGGAACTCACAGAGCG-BHQ1                           | 55°C                   |
| <i>SLC6A4</i><br>rs38130034 | F = AATAATAACCTCCATACACAATTGAG<br>R = TTCTTATCTCTAGTCCAATATTTTGG<br>FAM-TAGAATTTGTTAATGTAAGAAAAA-BHQ1<br>VIC-GAATTTGTTACTGTAAGAAAAA-BHQ | 55°C                   |

Table S3. Restrictases and restriction fragments.

| Gene          | rsID      | Endonuclease | Sizes of fragments    |
|---------------|-----------|--------------|-----------------------|
| <i>BDNF</i>   | rs2049046 | Hinfl        | A=163+35; T=198       |
| <i>BDNF</i>   | rs6265    | PspCI        | A=157; G=116+41       |
| <i>DBH</i>    | rs1611115 | FauI         | C=89+77, T=166        |
| <i>DBH</i>    | rs2097629 | BstMAI       | C=179+50, T=132+50+47 |
| <i>DRD2</i>   | rs6275    | BssT1I       | C=343; T=247+96       |
| <i>DRD2</i>   | rs1799732 | AgsI         | C=273; (-)=148+125    |
| <i>SLC6A3</i> | rs27072   | MspI         | CC=210+145, TT=355    |

|             |       |        |                   |
|-------------|-------|--------|-------------------|
| <i>DRD1</i> | rs686 | BstC8I | GG=161+71; AA=230 |
|-------------|-------|--------|-------------------|
